# Supplementary material
Source: publisher figshare collection journal article supplement (https://acs.figshare.com/ndownloader/files/13534358)
Supplement: Supplementary file 1 [file 13534358]

# **Synthesis and Characterization of *meso*-Substituted Cobalt Tetradehydrocorrin and Evaluation of Its Electrocatalytic Behavior Toward CO<sub>2</sub> Reduction and H<sub>2</sub> Evolution**

*Supporting Information*

*Ayumu Ogawa<sup>1</sup>, Koji Oohora<sup>\*,1,2</sup> and Takashi Hayashi<sup>\*,1</sup>*

*<sup>1</sup>Department of Applied Chemistry, Graduate School of Engineering, Osaka University,*

*Suita 565-0871, Japan*

*<sup>2</sup>PRESTO, JST, 4-1-8 Honcho Kawaguchi Saitama 332-0012, Japan*

## Spectral information

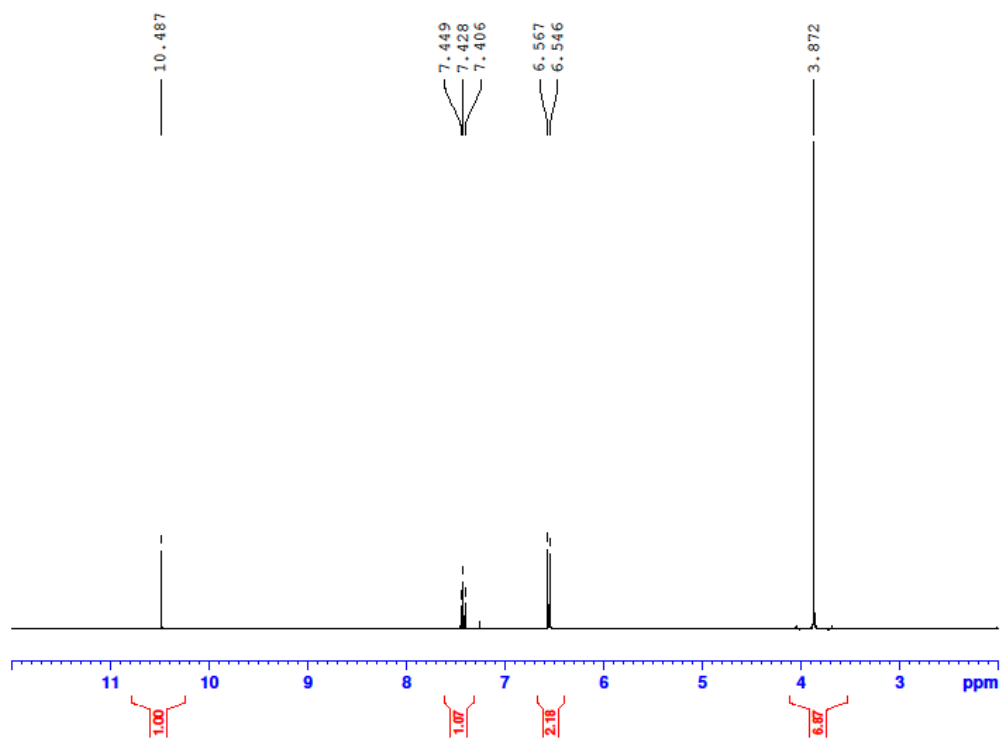

**Figure S1.** <sup>1</sup>H NMR spectrum of compound 1.

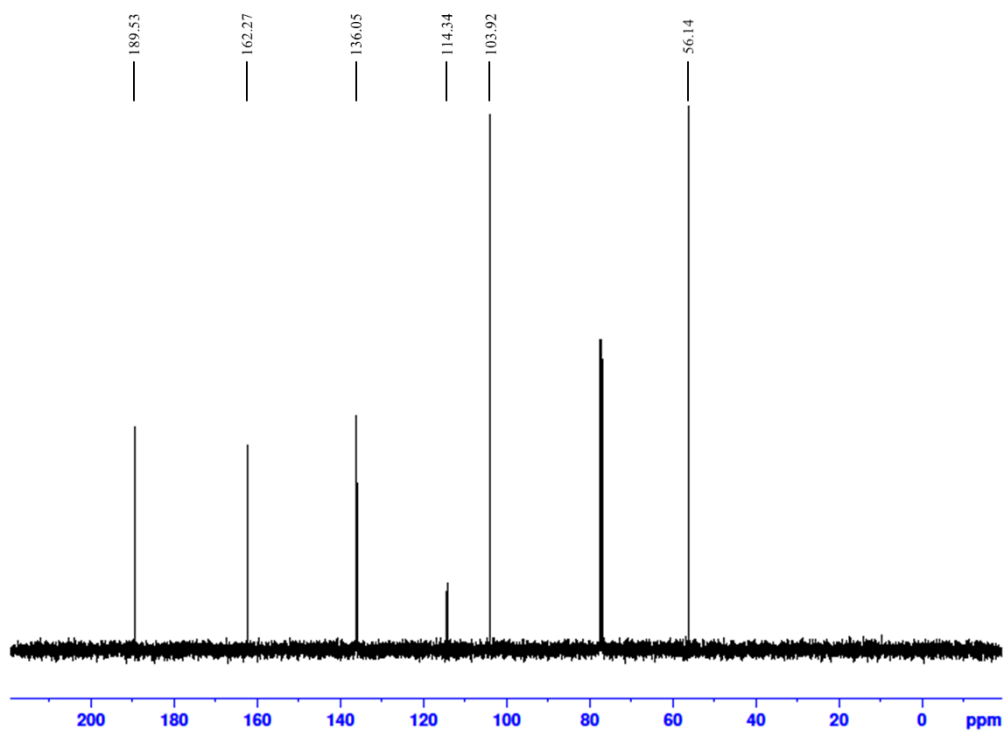

**Figure S2.** <sup>13</sup>C{<sup>1</sup>H} NMR spectrum of compound 1.

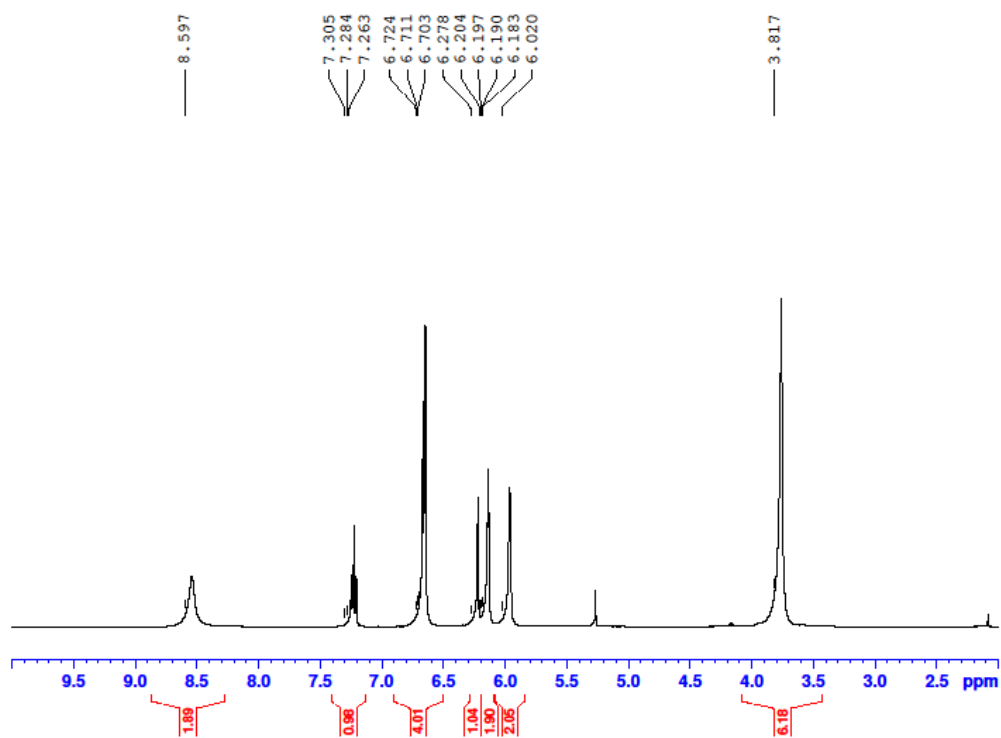

**Figure S3.**  $^1\text{H}$  NMR spectrum of compound **2**.

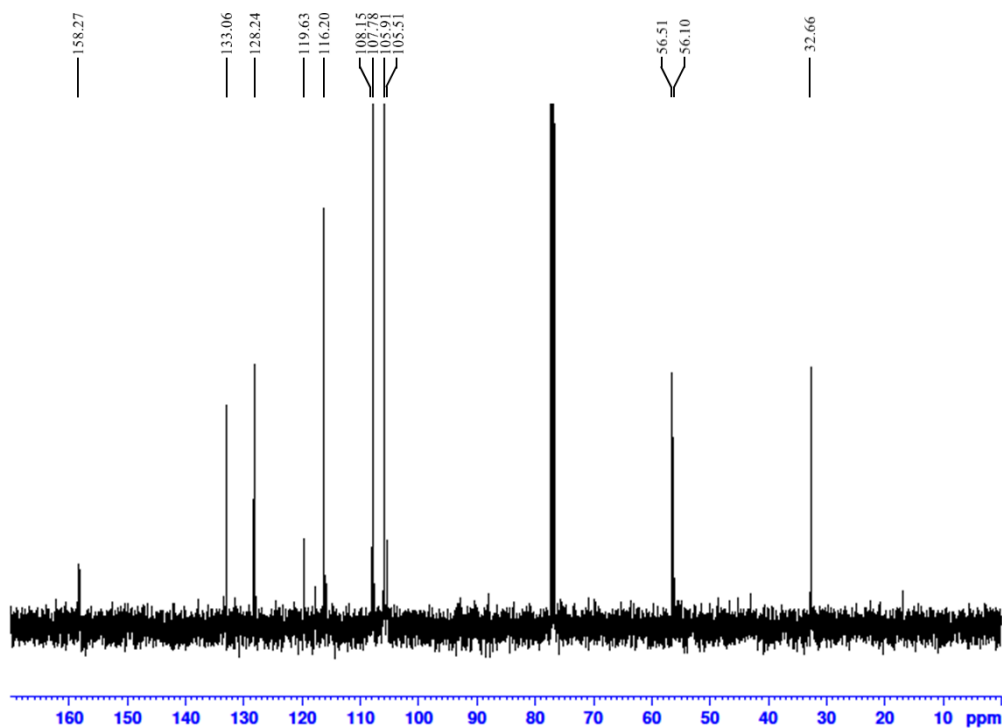

**Figure S4.**  $^{13}\text{C}\{^1\text{H}\}$  NMR spectrum of compound **2**.

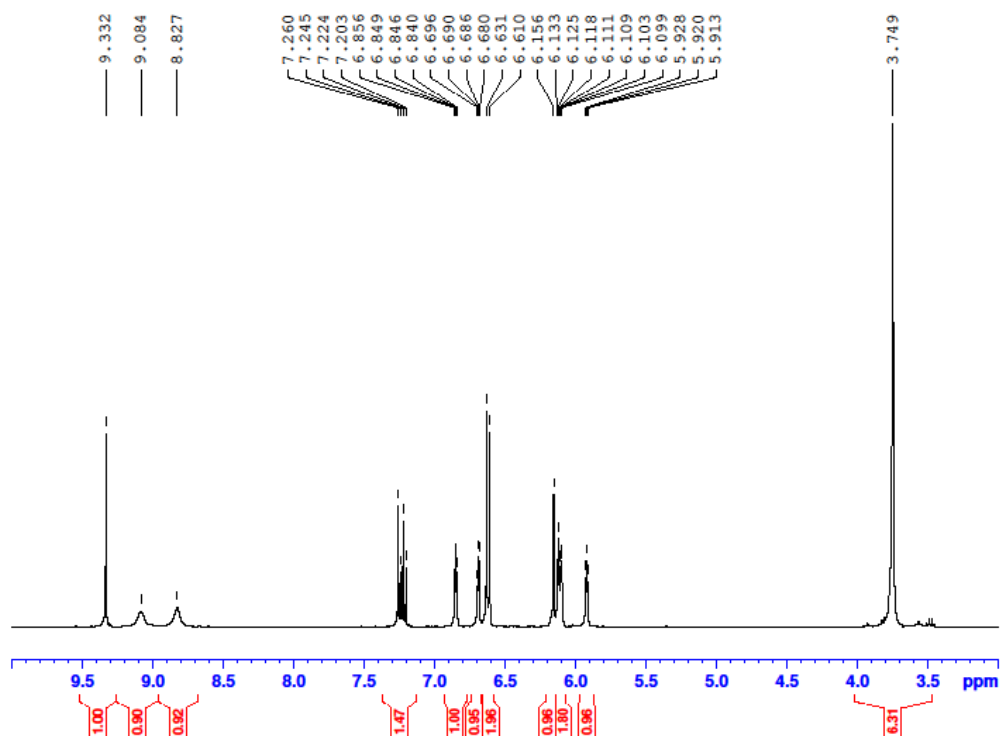

**Figure S5.** <sup>1</sup>H NMR spectrum of compound **3**.

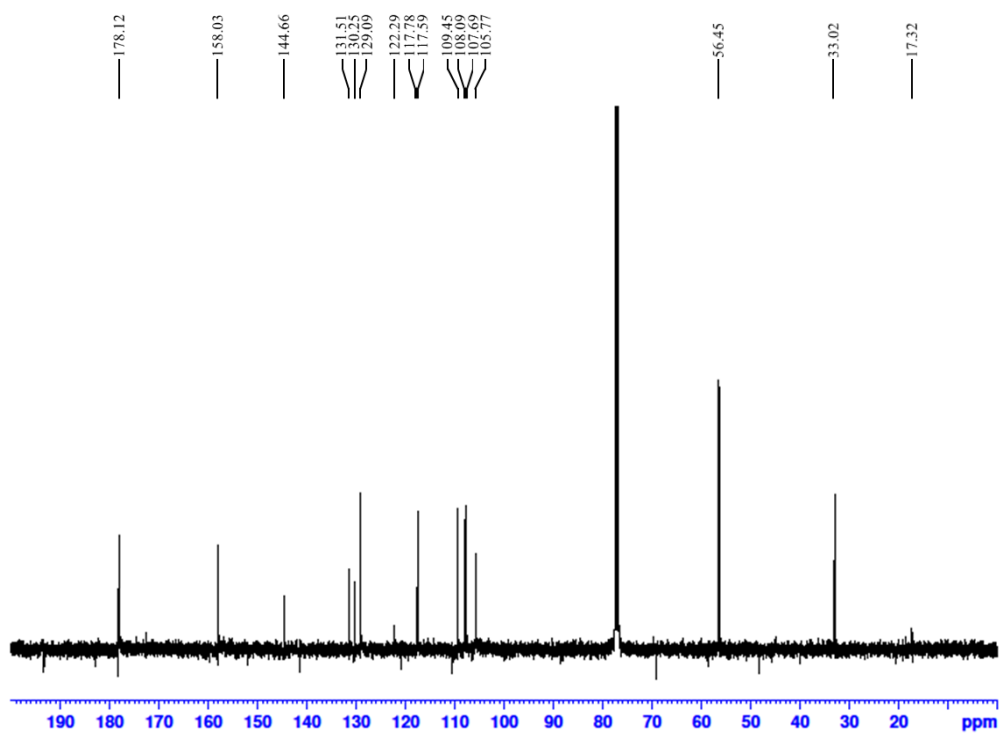

**Figure S6.** <sup>13</sup>C{<sup>1</sup>H} NMR spectrum of compound **3**.

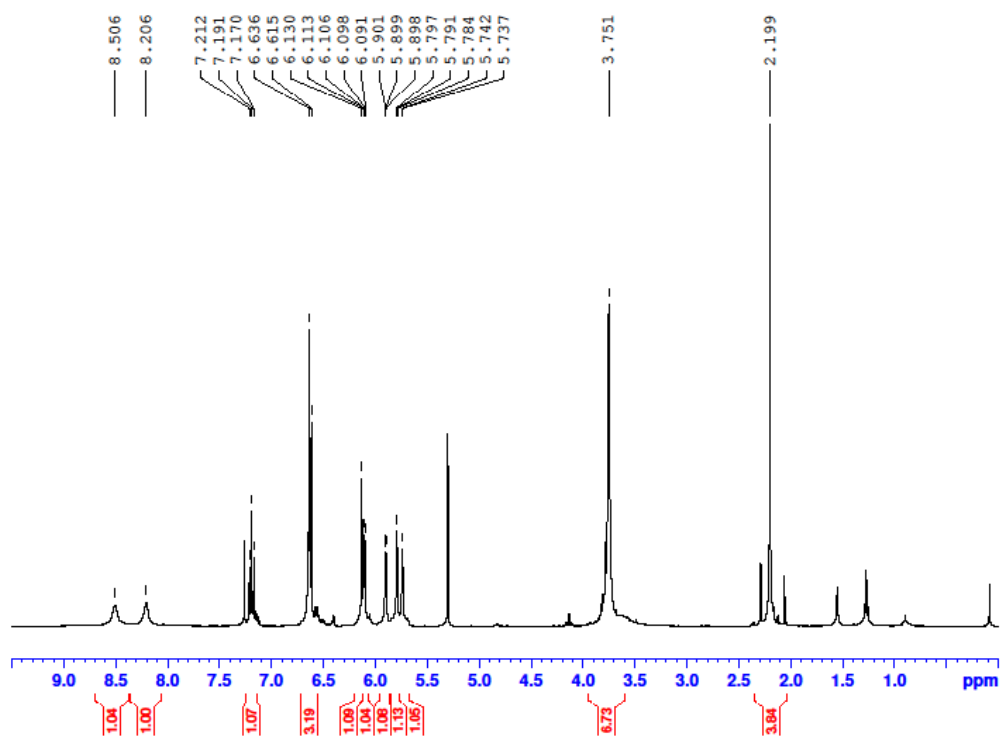

**Figure S7.**  $^1\text{H}$  NMR spectrum of compound **4**.

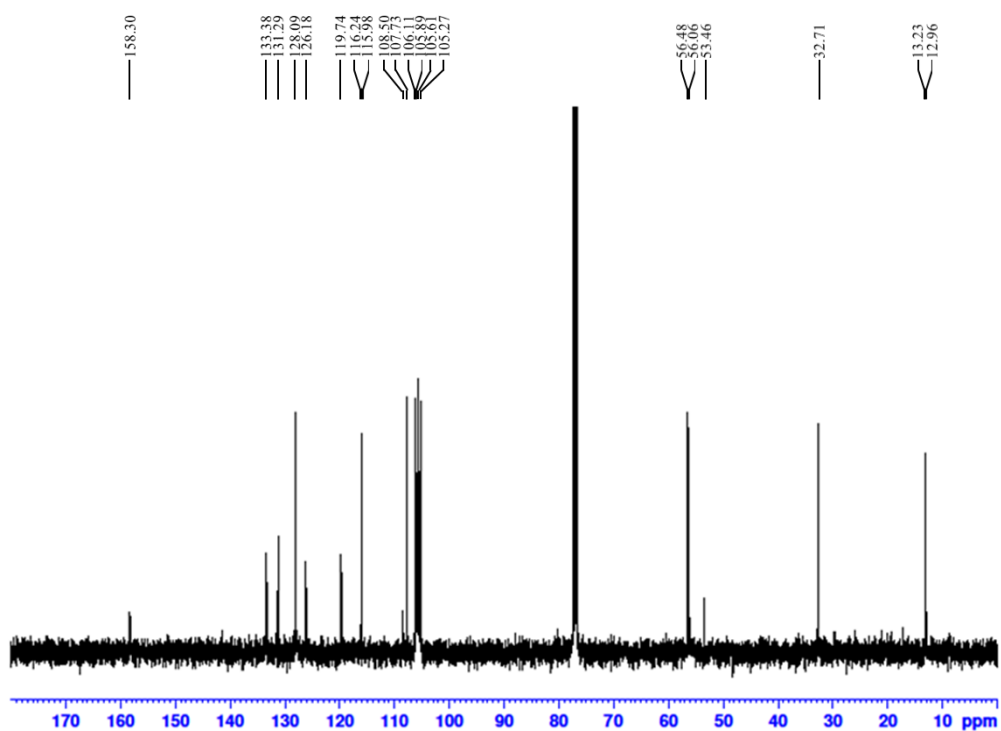

**Figure S8.**  $^{13}\text{C}\{^1\text{H}\}$  NMR spectrum of compound **4**.

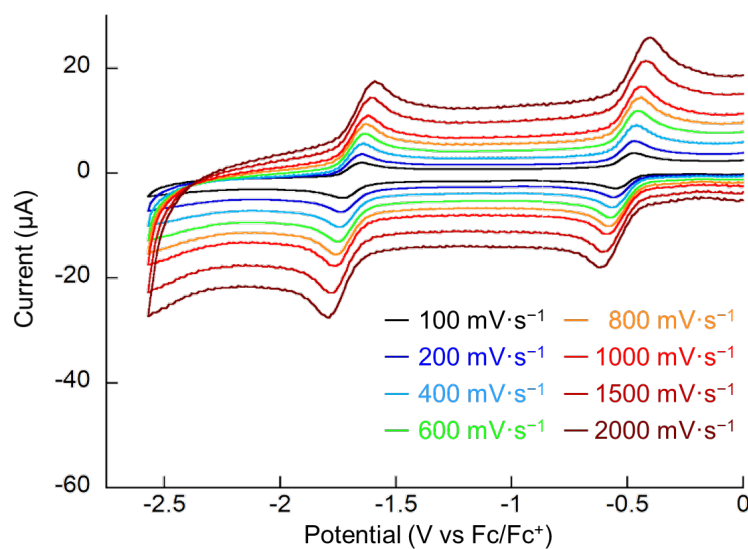

**Figure S9.** Cyclic voltammograms of **Co(II)TDHC** (0.5 mM) in anhydrous DMF with 0.1 M TBAPF<sub>6</sub> under an N<sub>2</sub> atmosphere. Scan rate varies from 100 to 2000 mV·s<sup>-1</sup>.

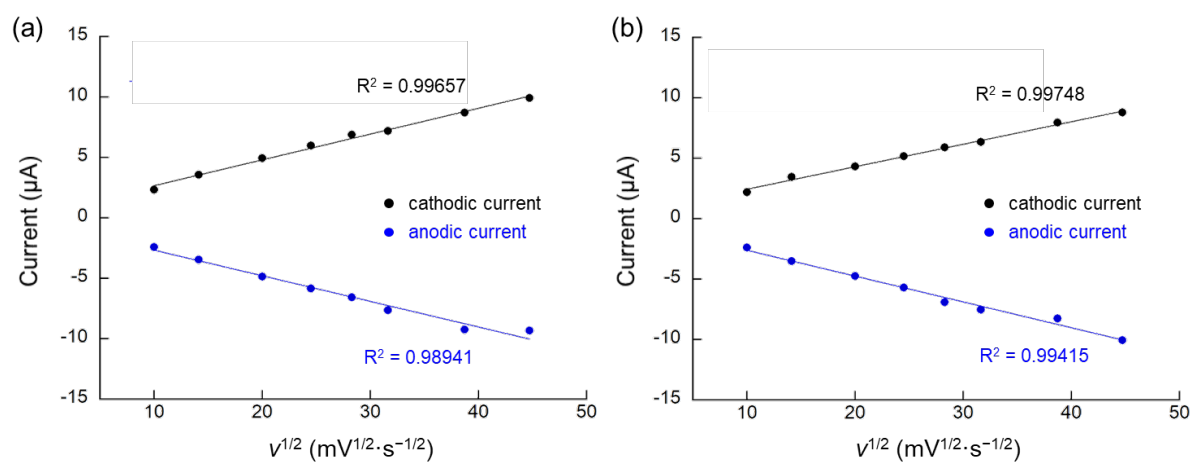

**Figure S10.** Plots of (a) first and (b) second redox peak currents against  $\nu^{1/2}$  in the cyclic voltammograms in anhydrous DMF with 0.1 M TBAPF<sub>6</sub> under an N<sub>2</sub> atmosphere.

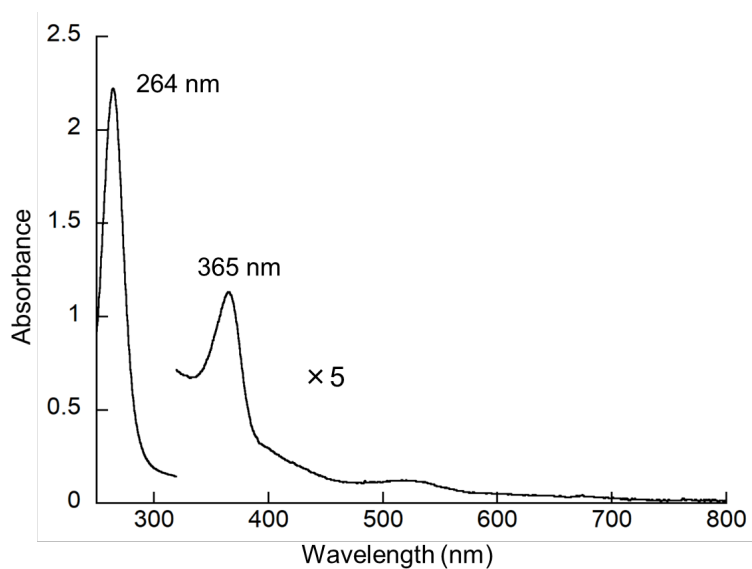

**Figure S11.** UV-vis absorption spectrum of cobaltocene under an  $N_2$  atmosphere in  $CH_2Cl_2$ .

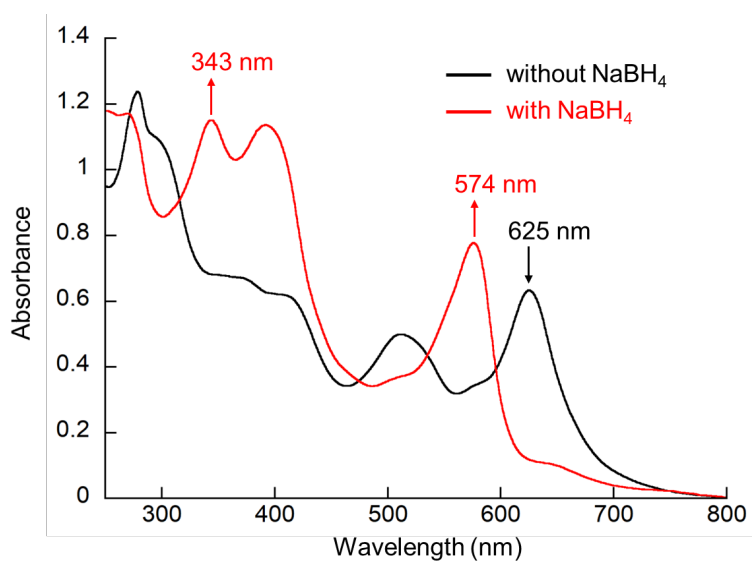

**Figure S12.** UV-vis absorption spectra of  $Co(II)TDHC$  in the absence (black) and presence (red) of  $NaBH_4$  in THF.

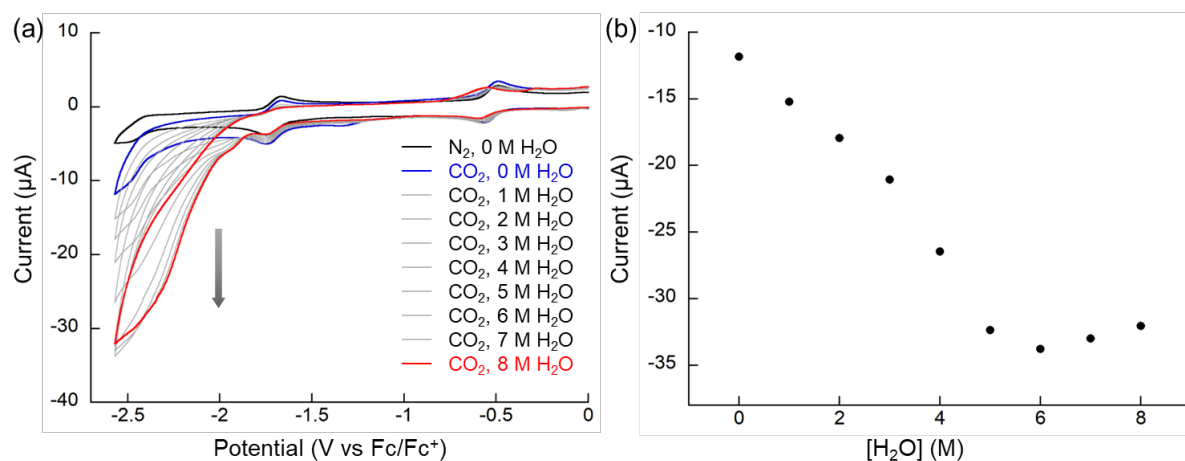

**Figure S13.** (a) Cyclic voltammograms of **Co(II)TDHC** (0.5 mM) in dry DMF with 0.1 M TBAPF<sub>6</sub> at a scan rate of 100 mV·s<sup>-1</sup> under an N<sub>2</sub> atmosphere (black). Addition of H<sub>2</sub>O under a CO<sub>2</sub> atmosphere (from blue to red): [H<sub>2</sub>O] = 0, 1, 2, 3, 4, 5, 6, 7 and 8 M. (b) Relationship between the concentration of H<sub>2</sub>O and current at -2.57 V in cyclic voltammetry.

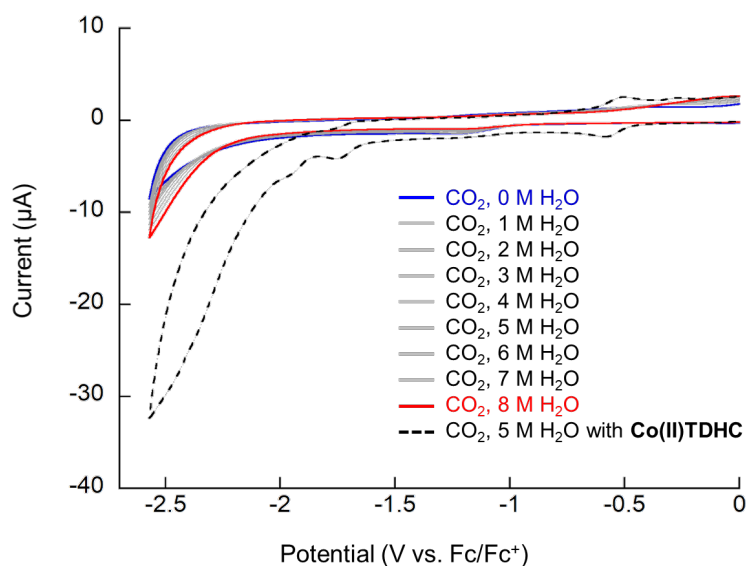

**Figure S14.** Cyclic voltammograms without catalyst in DMF with 0.1 M TBAPF<sub>6</sub> at a scan rate of 100 mV·s<sup>-1</sup> under a CO<sub>2</sub> atmosphere upon addition of H<sub>2</sub>O ranging from 0 M (blue) to 8 M (red). Black dotted line shows the redox behavior of **Co(II)TDHC** (0.5 mM) in the presence of 5 M H<sub>2</sub>O under a CO<sub>2</sub> atmosphere.



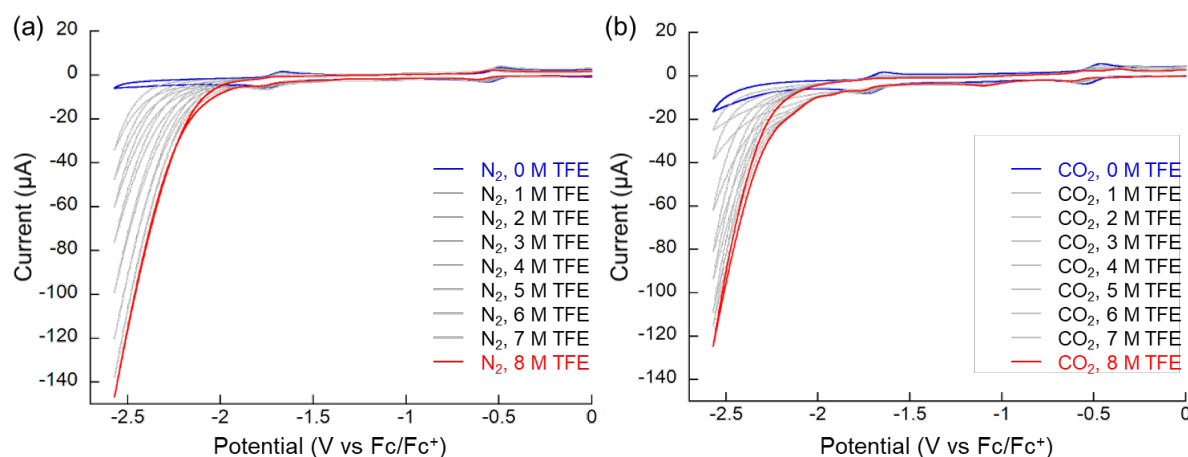

**Figure S15.** Cyclic voltammograms of **Co(II)TDHC** (0.5 mM) in DMF with 0.1 M TBAPF<sub>6</sub> at a scan rate of 100 mV·s<sup>-1</sup> under (a) an N<sub>2</sub> atmosphere and (b) a CO<sub>2</sub> atmosphere upon addition of 2,2,2-trifluoroethanol (TFE) ranging from 0 M (blue) to 8 M (red).

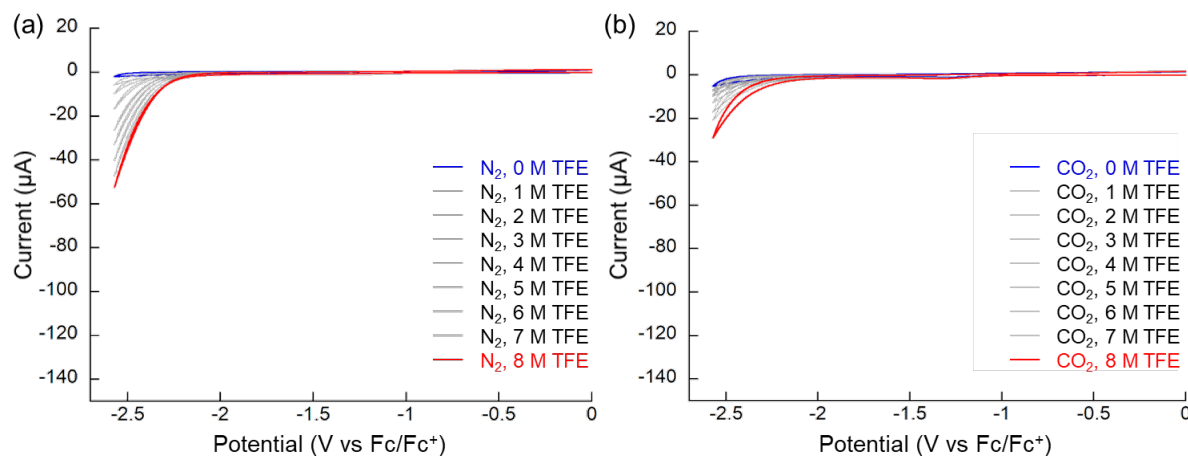

**Figure S16.** Cyclic voltammograms without catalyst in DMF with 0.1 M TBAPF<sub>6</sub> at a scan rate of 100 mV·s<sup>-1</sup> under (a) an N<sub>2</sub> atmosphere and (b) a CO<sub>2</sub> atmosphere upon addition of TFE ranging from 0 M (blue) to 8 M (red).

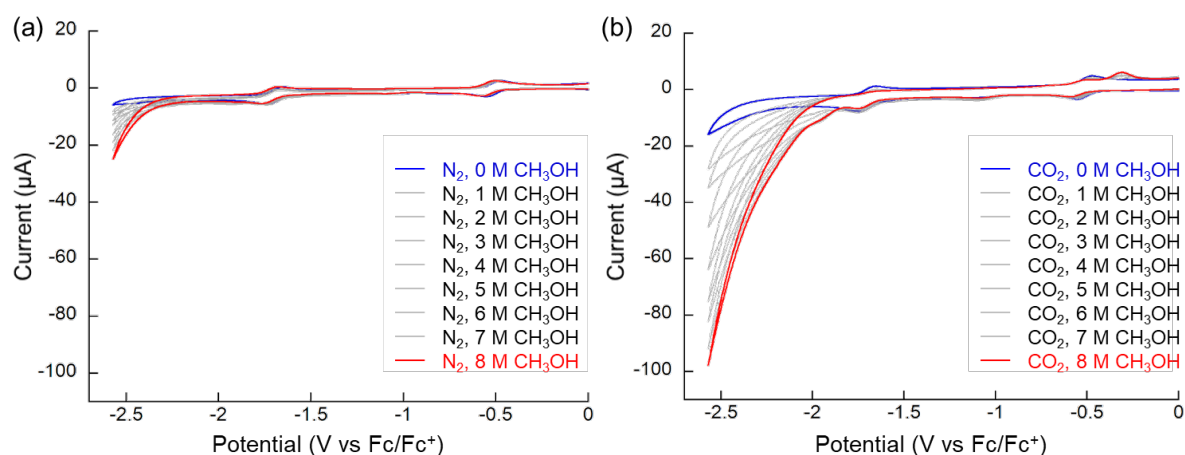

**Figure S17.** Cyclic voltammograms of **Co(II)TDHC** (0.5 mM) in DMF with 0.1 M TBAPF<sub>6</sub> at a scan rate of 100 mV·s<sup>-1</sup> under (a) an N<sub>2</sub> atmosphere and (b) a CO<sub>2</sub> atmosphere upon addition of CH<sub>3</sub>OH ranging from 0 M (blue) to 8 M (red).

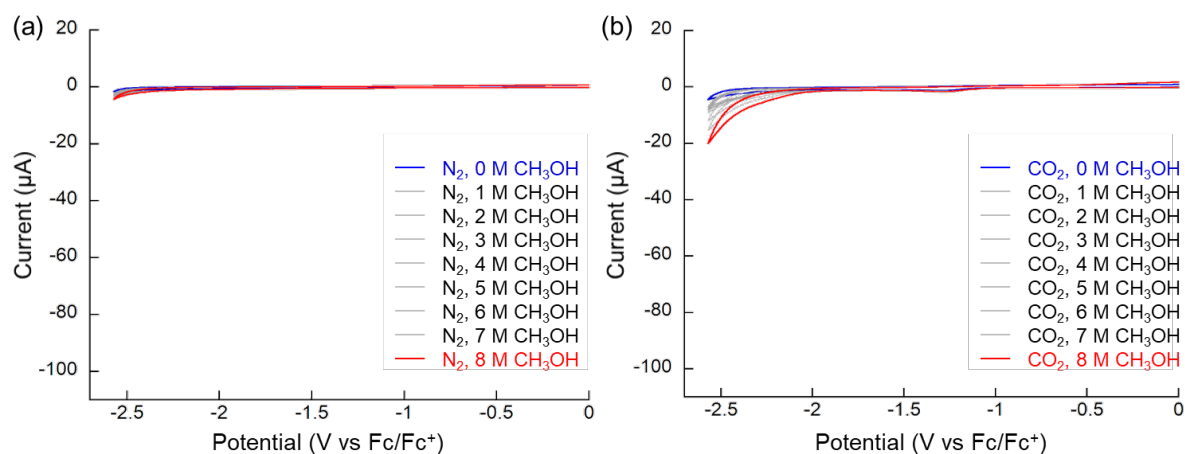

**Figure S18.** Cyclic voltammograms without catalyst in DMF with 0.1 M TBAPF<sub>6</sub> at a scan rate of 100 mV·s<sup>-1</sup> under (a) an N<sub>2</sub> atmosphere and (b) a CO<sub>2</sub> atmosphere upon addition of CH<sub>3</sub>OH ranging from 0 M (blue) to 8 M (red).

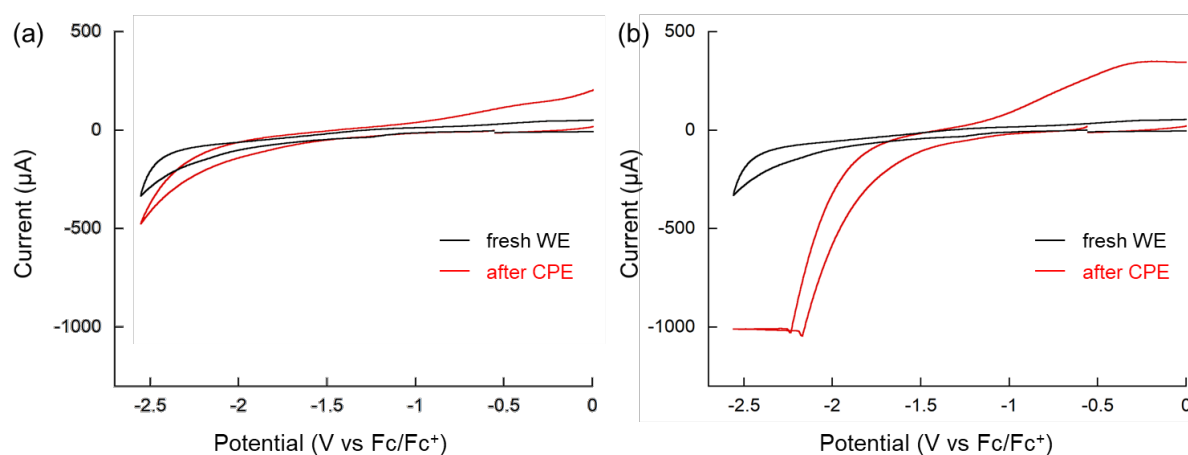

**Figure S19.** Cyclic voltammograms of the glassy carbon plate electrode (5.8 cm<sup>2</sup> surface area) without catalyst before (black) and after (red) a controlled-potential electrolysis with (a) 2 M H<sub>2</sub>O and (b) 3 M H<sub>2</sub>O in wet DMF + 0.1 M TBAPF<sub>6</sub> solution at a scan rate of 100 mV·s<sup>-1</sup> under a CO<sub>2</sub> atmosphere. A plateau current in (b) is caused by the limitation of the potentiostat.

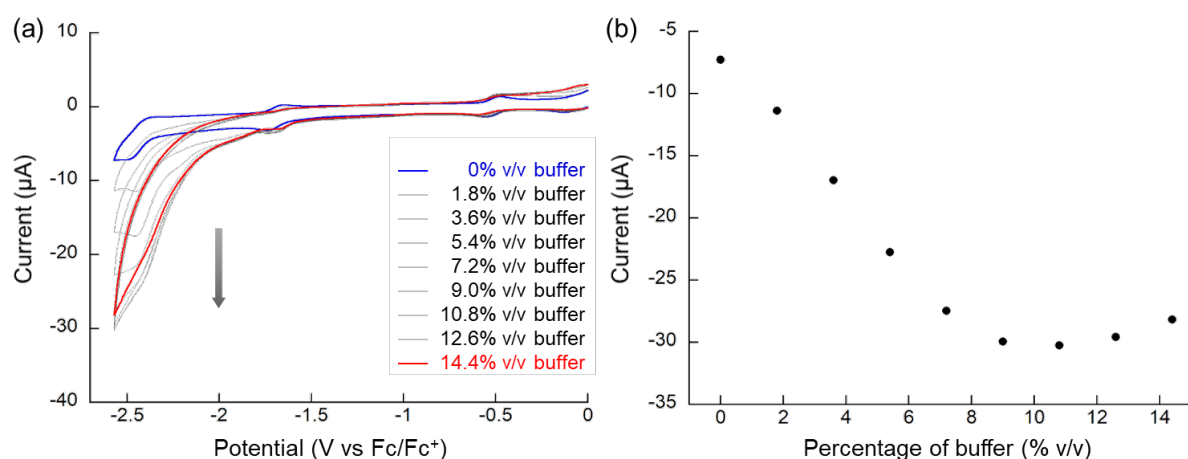

**Figure S20.** (a) Cyclic voltammograms of Co(II)TDHC (0.5 mM) in DMF with 0.1 M TBAPF<sub>6</sub> at a scan rate of 100 mV·s<sup>-1</sup> upon addition of buffer solution under an N<sub>2</sub> atmosphere ranging from 0% v/v (blue) to 14.4% v/v (red). (b) Relationship between the percentage of buffer solution and current at -2.57 V in cyclic voltammetry.

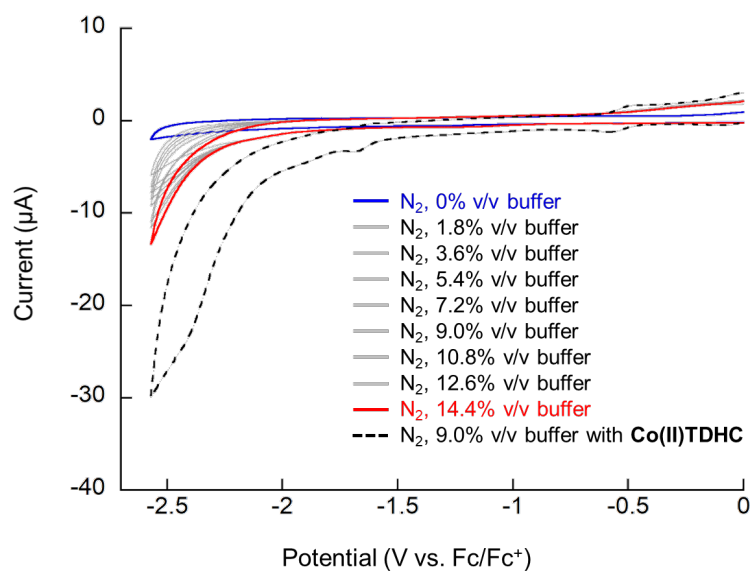

**Figure S21.** Cyclic voltammograms without catalyst in DMF with 0.1 M  $\text{TBAPF}_6$  at a scan rate of  $100 \text{ mV}\cdot\text{s}^{-1}$  upon addition of buffer solution under an  $\text{N}_2$  atmosphere ranging from 0% v/v (blue) to 14.4% v/v (red). Black dotted line shows the redox behavior of  $\text{Co(II)TDHC}$  (0.5 mM) in the presence of 9.0% v/v buffer solution under an  $\text{N}_2$  atmosphere.

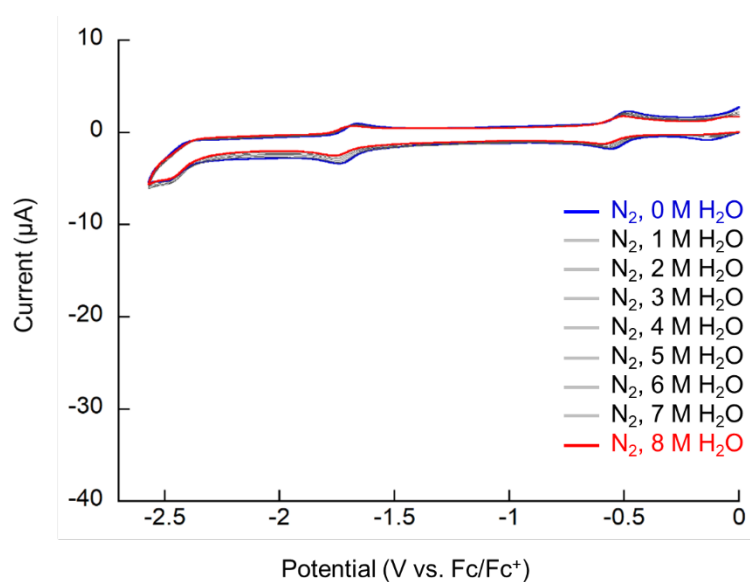

**Figure S22.** Cyclic voltammograms of  $\text{Co(II)TDHC}$  (0.5 mM) in dry DMF with 0.1 M  $\text{TBAPF}_6$  at a scan rate of  $100 \text{ mV}\cdot\text{s}^{-1}$  under an  $\text{N}_2$  atmosphere upon addition of  $\text{H}_2\text{O}$  ranging from 0 M (blue) to 8 M (red).

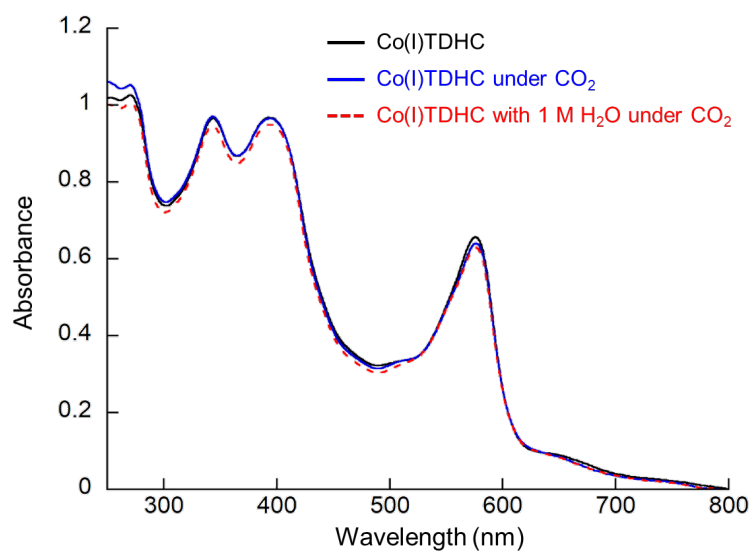

**Figure S23.** UV-vis absorption spectra of **Co(I)TDHC** generated by  $\text{NaBH}_4$  reduction under an  $\text{N}_2$  atmosphere (black solid), under a  $\text{CO}_2$  atmosphere (blue solid) and with 1 M  $\text{H}_2\text{O}$  under a  $\text{CO}_2$  atmosphere (red dotted) in THF.
